# Supplementary material for: Identification of the Ghrelin and Cannabinoid CB2 Receptor Heteromer Functionality and Marked Upregulation in Striatal Neurons from Offspring of Mice under a High-Fat Diet
Source: MDPI journal article supplement (doi:10.3390/ijms22168928), 2021-08-19

## **Supplementary material**

**Identification of the ghrelin and cannabinoid CB<sub>2</sub> receptor heteromer. Functionality and marked upregulation in striatal neurons of siblings of mice under a high-fat diet.**

### **Running title. Ghrelin-cannabinoid receptor interactions**

Jaume Lillo<sup>1,2,#</sup>, Alejandro Lillo<sup>3,#</sup>, David A. Zafra<sup>3</sup>, Cristina Miralpeix<sup>4</sup>, Rafael Rivas-Santisteban<sup>1,2</sup>, Núria Casals<sup>4,5</sup>, Gemma Navarro<sup>1,3,6,##</sup>, Rafael Franco<sup>1,2,7,##\*</sup>,

### **Affiliations:**

<sup>1</sup> Centro de Investigación Biomédica en Red Enfermedades Neurodegenerativas (CiberNed), National Institute of Health Carlos iii. Valderrebollo, 5, 28031 Madrid, Spain.

<sup>2</sup> Departament de Bioquímica i Biomedicina Molecular, Universitat de Barcelona, 08028 Barcelona, Spain

<sup>3</sup> Department of Biochemistry and Physiology, Faculty of Pharmacy and Food Science, University of Barcelona, Barcelona, Spain

<sup>4</sup> Basic Sciences Department, Faculty of Medicine and Health Sciences, Universitat Internacional de Catalunya, Sant Cugat del Vallès, Spain

<sup>5</sup> Centro de Investigación Biomédica en Red de Fisiopatología de la Obesidad y la Nutrición (CIBEROBN), Instituto de Salud Carlos III, Madrid, Spain

<sup>6</sup> Institut de Neurociències de la Universitat de Barcelona (UBNeuro), Barcelona. Spain

<sup>7</sup> School of Chemistry. University of Barcelona, Barcelona, Spain.

### **# Equal contribution**

### **\*Corresponding authors:**

Rafael Franco ([rfranco123@gmail.com](mailto:rfranco123@gmail.com); [rfranco@ub.edu](mailto:rfranco@ub.edu))  
School of Biology. Universitat de Barcelona.  
Diagonal 643. Prevosti Building.  
Barcelona 08028. Spain  
Tel +34 934021208

Gemma Navarro ([g.navarro@ub.edu](mailto:g.navarro@ub.edu))  
School of Pharmacy. Universitat de Barcelona  
Joan XXIII, 29-31  
Barcelona 08028. Spain  
Tel +34 934034500

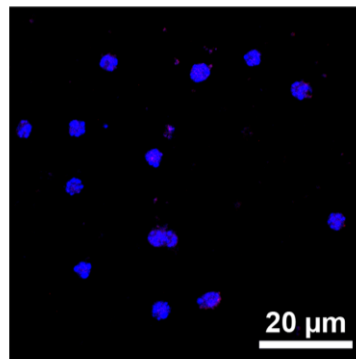

Supplementary Figure S1: Negative control of the *in situ* proximity ligation assay (PLA) in primary striatal neurons, undertaken by omitting one of the primary antibodies. Similar results were performed in samples from 5 animals coming from SD mothers and 5 from HFD mothers. Scale bar: 20  $\mu$ m.

Western compilation:

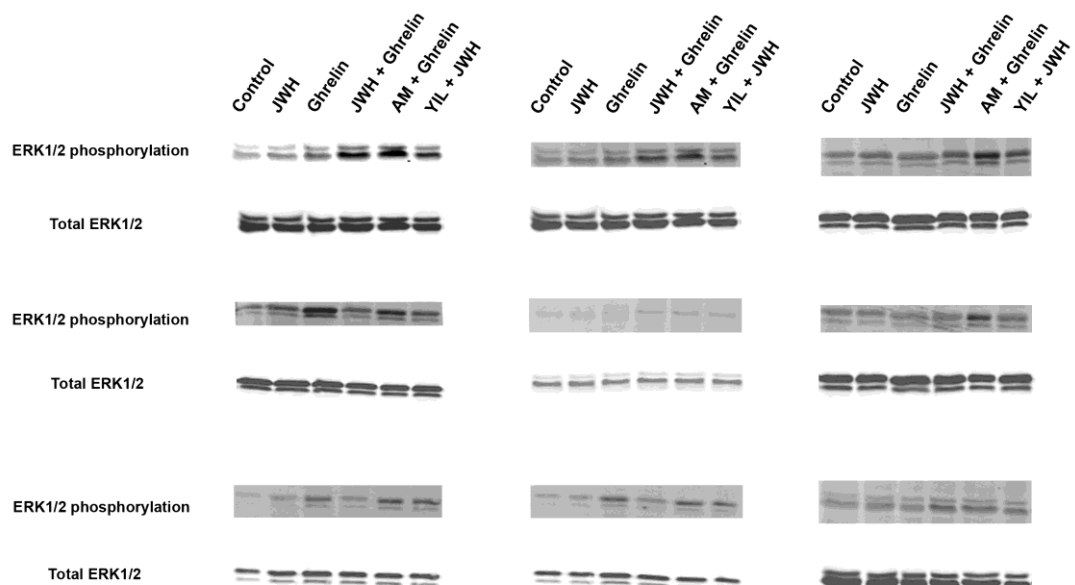

Supplement: s1 [file s1]
